# Supplementary material for: Specification of motoneurons from human embryonic stem cells
Source: Springer Nature journal article supplement (doi:10.1038/nbt1063), 2005-01-30
Supplement: nbt1063-S2.pdf [file nbt1063-S2.pdf]

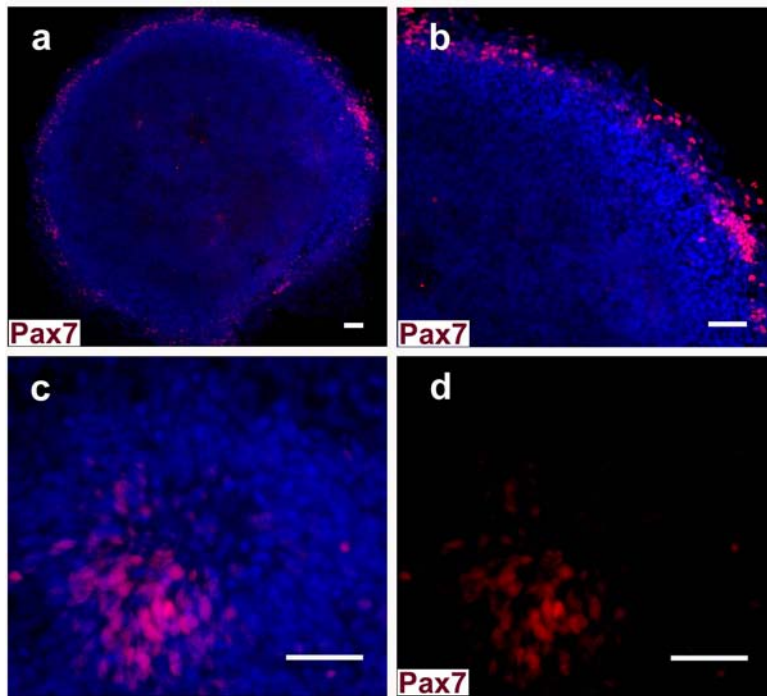

**Supplemental Figure 2** Expression of Pax7 by neuroectodermal cells. ES cells differentiated in FGF2 for 10 days developed early rosettes in the colony center. Cells surrounding and at the edge of rosettes were positive for Pax7 (**a, b**). After an additional 4 days, neural tube-like rosettes formed and some cells in the rosettes were positive for Pax7 (**c, d**). Blue indicates Hoechst stained nuclei. Bar=50  $\mu$ m.
